# Supplementary material for: Using Zoo Welfare Assessments to Identify Common Issues in Developing Country Zoos
Source: Animals (Basel). 2020 Nov 12;10(11):2101. doi: 10.3390/ani10112101 (PMC7696472; doi:10.3390/ani10112101)
Supplement: Supplementary file 1 [file animals-10-02101-s001.pdf]

## Supplementary Materials File 1

### **Nutrition**

#### Areas of concern across zoos [modal value 1]:

- Are feeding enrichment techniques used?
- Are live vertebrate animals offered as food to any animal?

#### Areas of questionable practice [modal value 2]:

- Is dietary supplementation given?
- Are food and drink provided in such a way that they meet the biological and behavioural needs of the animal?
- Are there feeding protocols in place should hand rearing be necessary?

#### Areas of good practice across zoos [modal value 3]:

- Are the animals generally in good body condition?
- Are there any animals that are underweight?
- Are there any animals that are overweight?
- Do all animals have ready access to plenty of clean, potable water?
- Is food sourced from a reputable supplier, ensuring that it is free from any contaminants?
- Is the quality of animal foodstuffs adequate and acceptable?
- Is the quantity of food provided for the animals documented, adequate and the consumption thereof, monitored?
- Does the provided food meet the specific nutritional requirements of each species and of each individual?
- Are supplies of food and drink prepared under hygienic conditions?
- Is food stored correctly to protect it from damp, deterioration and contamination by pests?
- Are perishable foods kept refrigerated?
- Is the manner of feeding safe for both the animals and the staff?
- Are there enough food and drinking sites so as to be accessible to every animal within a particular enclosure?
- Are the diets of the animals reviewed regularly?

#### Areas of concern across zoos [at least one zoo is scoring 1 for this measure]

- Are there any animals that are underweight?
- Are there any animals that are overweight?
- Do all animals have ready access to plenty of clean, potable water?
- Is the quantity of food provided for the animals documented, adequate and the consumption thereof, monitored?
- Are feeding enrichment techniques used?
- Are the diets of the animals reviewed regularly?
- Are there feeding protocols in place should hand rearing be necessary?
- Are live vertebrate animals offered as food to any animal?

#### Areas which are considered fully unacceptable [all zoos scored 1]

- Are live vertebrate animals offered as food to any animal?

#### Areas which are considered fully acceptable [all zoos scored 3]

- Is food sourced from a reputable supplier, ensuring that it is free from any contaminants?
- Is the quality of animal foodstuffs adequate and acceptable?
- Is the manner of feeding safe for both the animals and the staff?

**Box S1.** A breakdown of scores given on the wild welfare audit on questions related to nutritional provision.

## **Environment**

### Areas of concern across zoos [modal value 1]:

- Are animals kept in temporary accommodation? If yes, is their situation regularly and appropriately assessed?

### Areas of questionable practice [modal value 2]:

- Does management practice ensure that physical carrying capacity is not overburdened?
- Is the drainage of the majority of enclosures safe, efficient and appropriate?
- In aquatic enclosures are appropriate water quality parameters measured and controlled?
- Do the majority of enclosure environments provide for the well-being of the animals throughout the year?
- Is there adequate ventilation and appropriate lighting in indoor areas and holding areas?
- Are the majority of the enclosure substrates, design features and furniture sufficient to provide enough shelter and refuge for all specimens displayed, including those kept in multi-species exhibits?
- Is quarantine implemented on arrival of acquisitions?

### Areas of good practice across zoos [modal value 3]:

- Do the majority of the enclosures appear to be clean and well maintained?
- Is the total number of animals accommodated appropriate for the area of land occupied by the institution and the available resources?
- Are the enclosures free from vegetation or other items that would aid animal escape?
- Are gates/doors to enclosures containing hazardous animals securely locked at all times?
- Do gates/doors to enclosures appear to be as strong and effective in containing the animals as the rest of the enclosure barrier?
- Can personnel service all enclosures in a manner that is both safe to themselves and the inhabitants?
- Are the environmental temperature and humidity levels maintained appropriately for the animals?
- Are any of the enclosures located where there is loud or excessive noise?
- Are there facilities for crating and transporting animals?
- Are routine veterinary examinations performed prior to transport?

### Areas of concern across zoos [at least one zoo is scoring 1 for this measure]

- Does management practice ensure that physical carrying capacity is not overburdened?
- Is the drainage of the majority of enclosures safe, efficient and appropriate?
- Can personnel service all enclosures in a manner that is both safe to themselves and the inhabitants?
- Are animals kept in temporary accommodation? If yes, is their situation regularly and appropriately assessed?
- Do the majority of enclosure environments provide for the well-being of the animals throughout the year?
- Is there adequate ventilation and appropriate lighting in indoor areas and holding areas?
- Are any of the enclosures located where there is loud or excessive noise?
- Are the majority of the enclosure substrates, design features and furniture sufficient to provide enough shelter and refuge for all specimens displayed, including those kept in multi-species exhibits?
- Is quarantine implemented on arrival of acquisitions?

### Areas which are considered fully unacceptable [all zoos scored 1]

- None

### Areas which are considered fully acceptable [all zoos scored 3]

- Do gates/doors to enclosures appear to be as strong and effective in containing the animals as the rest of the enclosure barrier?
- Are there facilities for crating and transporting animals?

**Box S2.** A breakdown of scores given on the wild welfare audit on questions related to the environment in which animals are housed.

### **Health**

#### Areas of concern across zoos [modal value 1]:

- Are the quarantine facilities and quarantine protocols appropriate?
- Are there written protocols for the euthanasia of animals?
- Is euthanasia carried out under veterinary supervision, or by a competent, senior staff member properly trained and experienced in the techniques used, who has access to the necessary equipment and facilities and who is available at all times?
- Is there any form of ethical review or oversight?

#### Areas of questionable practice [modal value 2]:

- Are the biosecurity measures in place sufficient and suitable?
- Do the animals appear to be in good health, with no obvious signs or injury or illness?
- Is there a safe and effective programme for the control of pests and where necessary, predators?
- Does management practice ensure that an uncontrolled build-up of parasites and other pathogens is prevented?
- Are the circumstances mandating euthanasia or humane killing appropriate?

#### Areas of good practice across zoos [modal value 3]:

- Is the animal collection under the supervision of a veterinarian?
- Does the level of veterinary supervision and care provided appear to be adequate for the size of the institution and number of animals accommodated?
- Is there clear effective communication between the veterinarian and the institution's animal care team?
- Is the response time between noticing/reporting an animal health problem and the receipt of appropriate veterinary care adequate?
- Is the veterinary examination/treatment room adequate and does it have suitable facilities to meet the needs of the collection?
- Is there proper, secure management of all veterinary medicines?
- Do mutilation procedures appear to have been carried out on any of the animals?
- Is the frequency of visual inspection of the animals by keeper staff suitable and the protocol for reporting health concerns effective?
- Are keeper observations of general animal health and behaviour recorded?
- Is the frequency of routine clinical examinations for all of the animals appropriate?
- Is there a suitable preventative medicine programme in place?
- Does the facility normally perform necropsies?
- Are suitable samples from necropsies submitted for pathological analysis?
- Is the area where necropsies are performed suitable?
- Are deceased animals stored away from food and disposed of appropriately?
- Is there well maintained and appropriate animal capture equipment available on site, along with a sufficient number of trained staff to use it?
- Does the facility maintain up-to-date veterinary records on the health of individual animals within the collection?
- Does a review of clinical records, animal health management and disease issues take place?

### Health cont'd

#### Areas of concern across zoos [at least one zoo is scoring 1 for this measure]

- Does the level of veterinary supervision and care provided appear to be adequate for the size of the institution and number of animals accommodated?
- Is the veterinary examination/treatment room adequate and does it have suitable facilities to meet the needs of the collection?
- Are the quarantine facilities and quarantine protocols appropriate?
- Are the biosecurity measures in place sufficient and suitable?
- Are keeper observations of general animal health and behaviour recorded?
- Is the frequency of routine clinical examinations for all of the animals appropriate?
- Is there a suitable preventative medicine programme in place?
- Is there a safe and effective programme for the control of pests and where necessary, predators?
- Does management practice ensure that an uncontrolled build-up of parasites and other pathogens is prevented?
- Is there well maintained and appropriate animal capture equipment available on site, along with a sufficient number of trained staff to use it?
- Does the facility maintain up-to-date veterinary records on the health of individual animals within the collection?
- Does a review of clinical records, animal health management and disease issues take place?
- Are there written protocols for the euthanasia of animals?
- Is euthanasia carried out under veterinary supervision, or by a competent, senior staff member properly trained and experienced in the techniques used, who has access to the necessary equipment and facilities and who is available at all times?
- Are the circumstances mandating euthanasia or humane killing appropriate?
- Is there any form of ethical review or oversight?

#### Areas which are considered fully unacceptable [all zoos scored 1]

- None

#### Areas which are considered fully acceptable [all zoos scored 3]

- Is the animal collection under the supervision of a veterinarian?
- Is there clear effective communication between the veterinarian and the institution's animal care team?
- Are deceased animals stored away from food and disposed of appropriately?

**Box S3.** A breakdown of scores given on the wild welfare audit on questions related to animal health.

## **Behaviour**

### Areas of concern across zoos [modal value 1]:

- Are there any naturally social species currently housed in enclosures on their own?
- Does the facility have animal demonstrations, shows and/or animal rides or undertake any form of animal contact?

### Areas of questionable practice [modal value 2]:

- Where appropriate, are the animals maintained in social groups of suitable composition (eg number, age and sex ratio)?
- Does management practice ensure that persistent and unresolved conflict is avoided?
- Are the majority of the enclosure substrates, design features and furniture sufficient to provide for the behavioural needs of all individuals displayed, including those kept in multi-species exhibits?
- If there are free ranging animals on site (eg peacocks, guinea fowl), are they monitored and is there a documented husbandry and management protocol for their care?
- Do indoor, outdoor and holding enclosure areas all allow for normal behaviour patterns and ranges of movements to be expressed?
- Does the handling of animals by personnel appear to be consistent with the animal's welfare?
- If there are any animal-training programmes in place at the institution, are they documented and appropriate in technique, duration and purpose?
- Is physical punishment of the animals ever used?
- Is there regular monitoring and review of animal contact and training programmes?

### Areas of good practice across zoos [modal value 3]:

- Does management practice ensure that undue dominance by individuals is avoided?
- Is separate accommodation provided where appropriate for pregnant mothers and animals with young?
- Does the unregulated feeding of the animals by visitors take place?
- Is the regulated feeding of specific animals by visitors permitted? If so, under what specific circumstances is it allowed and how is it supervised, controlled and managed?
- Are animals handled only by or under the supervision of authorised personnel?

### Areas of concern across zoos [at least one zoo is scoring 1 for this measure]

- Are there any naturally social species currently housed in enclosures on their own?
- Does management practice ensure that undue dominance by individuals is avoided?
- Does management practice ensure that persistent and unresolved conflict is avoided?
- Are the majority of the enclosure substrates, design features and furniture sufficient to provide for the behavioural needs of all individuals displayed, including those kept in multi-species exhibits?
- Do indoor, outdoor and holding enclosure areas all allow for normal behaviour patterns and ranges of movements to be expressed?
- Does the unregulated feeding of the animals by visitors take place?
- Is the regulated feeding of specific animals by visitors permitted? If so, under what specific circumstances is it allowed and how is it supervised, controlled and managed?
- Does the facility have animal demonstrations, shows and/or animal rides or undertake any form of animal contact?
- Does the handling of animals by personnel appear to be consistent with the animal's welfare?
- Is physical punishment of the animals ever used?
- Is there regular monitoring and review of animal contact and training programmes?

### Areas which are considered fully unacceptable [all zoos scored 1]

- None

### Areas which are considered fully acceptable [all zoos scored 3]

- None

**Box S4.** A breakdown of scores given on the wild welfare audit on questions related to animal behavior.

### **Mental health**

#### Areas of concern across zoos [modal value 1]:

- Is environmental and behavioral enrichment regularly provided?
- Are negative animal behaviours (eg over-grooming, avoidance, stereotyping, hyper-aggression, apathy, etc) observed?

#### Areas of questionable practice [modal value 2]:

- Are the animal's welfare needs appropriately managed with due regard to the requirements of the viewing public?
- Are the animals generally bright, alert and interested and engaged in their surroundings?
- Are positive animal behaviours (eg play, exploration, rest, normal feeding, etc) observed?

#### Areas of good practice across zoos [modal value 3]:

- Are any of the animals restrained or tethered at any time?

#### Areas of concern across zoos [at least one zoo is scoring 1 for this measure]

- Are the animal's welfare needs appropriately managed with due regard to the requirements of the viewing public?
- Is environmental and behavioral enrichment regularly provided?
- Are the animals generally bright, alert and interested and engaged in their surroundings?
- Are negative animal behaviours (eg over-grooming, avoidance, stereotyping, hyper-aggression, apathy, etc) observed?
- Are any of the animals restrained or tethered at any time?

#### Areas which are considered fully unacceptable [all zoos scored 1]

- None

#### Areas which are considered fully acceptable [all zoos scored 3]

- None

**Box S5.** A breakdown of scores given on the wild welfare audit on questions related to the perceived mental state of the animals.

### **Animal records**

#### Areas of concern across zoos [modal value 1]:

- Does the facility have any form of collection plan?

#### Areas of questionable practice [modal value 2]:

- Can all of the animals held at the institution be individually identified? If so, what methods of individual animal identification are used?
- Is animal population management regularly reviewed?

#### Areas of good practice across zoos [modal value 3]:

- Are up to date records (including husbandry details, daily behavioural observations, etc) held for all individual animals?
- Is the system of recording information easy to search, secure and fit for purpose?
- Are there records kept of the movement of animals into and out of the institution?
- Are acquisition and disposition activities legal and ethical?

#### Areas of concern across zoos [at least one zoo is scoring 1 for this measure]

- Are up to date records (including husbandry details, daily behavioural observations, etc) held for all individual animals?
- Is the system of recording information easy to search, secure and fit for purpose?
- Are there records kept of the movement of animals into and out of the institution?
- Does the facility have any form of collection plan?
- Can all of the animals held at the institution be individually identified? If so, what methods of individual animal identification are used?
- Is animal population management regularly reviewed?

#### Areas which are considered fully unacceptable [all zoos scored 1]

- None

#### Areas which are considered fully acceptable [all zoos scored 3]

- None

**Box S6.** A breakdown of scores given on the wild welfare audit on questions related to the standard of animal record keeping.

### **Health & safety**

#### Areas of concern across zoos [modal value 1]:

- Are there procedures and equipment in place in the event of a dangerous animal escape?
- Are the emergency protocols practised and if so, how often?
- Are records kept in the event of an animal escape/attack?
- Do staff receive training in animal health, disinfection principles and hygiene practices?
- Does the facility have clear procedures for working with hazardous animals?

#### Areas of questionable practice [modal value 2]:

- None

#### Areas of good practice across zoos [modal value 3]:

- None

#### Areas of concern across zoos [at least one zoo is scoring 1 for this measure]

- Are there procedures and equipment in place in the event of a dangerous animal escape?
- Are the emergency protocols practised and if so, how often?
- Are records kept in the event of an animal escape/attack?
- Do staff receive training in animal health, disinfection principles and hygiene practices?
- Does the facility have clear procedures for working with hazardous animals?

#### Areas which are considered fully unacceptable [all zoos scored 1]

- None

#### Areas which are considered fully acceptable [all zoos scored 3]

- Is the staff adequately directed?

**Box S7.** A breakdown of scores given on the wild welfare audit on questions related to staff health and safety.

**Personnel**Areas of concern across zoos [modal value 1]:

- None

Areas of questionable practice [modal value 2]:

- Are animal care staff up to date with developments in their field of expertise?

Areas of good practice across zoos [modal value 3]:

- Is the staff adequately directed?
- Is the staffing level appropriate to provide the required standards of animal husbandry and care?
- Do staff members regularly meet to discuss problems and possible solutions?
- In general, do there appear to be good working relations in the zoos?
- Is there provision for staff training and further development?

Areas of concern across zoos [at least one zoo is scoring 1 for this measure]

- Are animal care staff up to date with developments in their field of expertise?
- Is there provision for staff training and further development?

Areas which are considered fully unacceptable [all zoos scored 1]

- None

Areas which are considered fully acceptable [all zoos scored 3]

- Is the staff adequately directed?

**Box S8.** A breakdown of scores given on the wild welfare audit on questions related to 'other'.

**Physical facilities**Areas of concern across zoos [modal value 1]:

- None

Areas of questionable practice [modal value 2]:

- None

Areas of good practice across zoos [modal value 3]:

- Are there adequate provisions for the proper storage and disposal of animal waste?
- Does the facility have continuing financial support?
- Does the total financial support appear to be adequate to meet the needs of the facility?

Areas of concern across zoos [at least one zoo is scoring 1 for this measure]

- None

Areas which are considered fully unacceptable [all zoos scored 1]

- None

Areas which are considered fully acceptable [all zoos scored 3]

- None

**Box S9.** A breakdown of scores given on the wild welfare audit on questions on information relating to personnel working at the zoo.

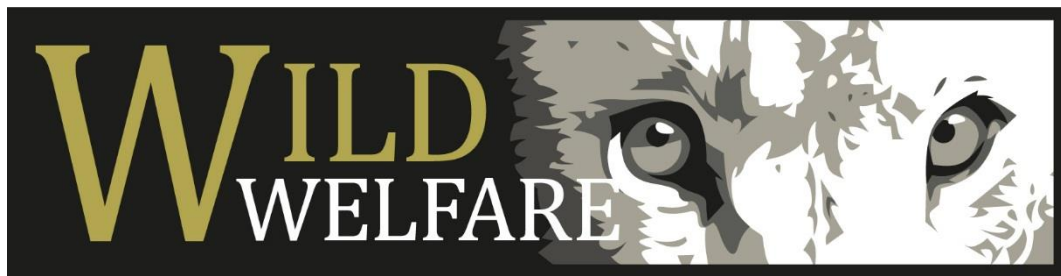

## LIVE COLLECTION PRELIMINARY ASSESSMENT FORM

### **Caveat:**

Management practices Wild Welfare considers unacceptable and which Wild Welfare recommends should cease in order to provide for good animal welfare include:

- The feeding of live vertebrate animals to any animal
- Training techniques involving physical punishment, or training practices that compromise the animal's physical or behavioural health, development or psychological well-being
- Animal demonstrations that are detrimental to the physical or psychological well-being of the animals
- Confinement in barren enclosures that severely restrict physical movement and compromise psychological wellbeing
- Mutilation procedures for cosmetic purposes or to make an animal safe for handling
- Unregulated feeding of the animals by visitors

Captive wild animal management must aim to provide suitable environments that provide for good welfare for all captive species; it is unacceptable to maintain any species in captivity in conditions that compromise their health and welfare.

### **Key:**

**A** = Acceptable (requires no immediate attention)

**Q** = Questionable (should be improved or changed as soon as possible, but is not a critical matter)

**UA** = Unacceptable (must be corrected).

**Nap** = Not applicable

**Nass** = Not assessed

Rate according to the 5 criteria and give notes, explanations and expanded points for all rankings

|    | <b>Veterinary Care</b>                                                                                                                               | <b>A</b> | <b>Q</b> | <b>UA</b> | <b>Nap</b> | <b>Nass</b> |
|----|------------------------------------------------------------------------------------------------------------------------------------------------------|----------|----------|-----------|------------|-------------|
| 1  | Is the animal collection under the supervision of a veterinarian?                                                                                    |          |          |           |            |             |
| 2  | Does the level of veterinary supervision and care provided appear to be adequate for the size of the institution and number of animals accommodated? |          |          |           |            |             |
| 3  | Is there clear effective communication between the veterinarian and the institution's animal care team?                                              |          |          |           |            |             |
| 4  | Is the response time between noticing/reporting an animal health problem and the receipt of appropriate veterinary care adequate?                    |          |          |           |            |             |
| 5  | Is the veterinary examination/treatment room adequate and does it have suitable facilities to meet the needs of the collection?                      |          |          |           |            |             |
| 6  | Is there proper, secure management of all veterinary medicines?                                                                                      |          |          |           |            |             |
| 7  | Are the quarantine facilities and quarantine protocols appropriate?                                                                                  |          |          |           |            |             |
| 8  | Are the biosecurity measures in place sufficient and suitable?                                                                                       |          |          |           |            |             |
| 9  | Do the animals appear to be in good health, with no obvious signs or injury or illness?                                                              |          |          |           |            |             |
| 10 | Do mutilation procedures appear to have been carried out on any of the animals?                                                                      |          |          |           |            |             |
| 11 | Is the frequency of visual inspection of the animals by keeper staff suitable and the protocol for reporting health concerns effective?              |          |          |           |            |             |
| 12 | Are keeper observations of general animal health and behaviour recorded?                                                                             |          |          |           |            |             |
| 13 | Is the frequency of routine clinical examinations for all of the animals appropriate?                                                                |          |          |           |            |             |

|    |                                                                                                                                                                                                                                                     |          |          |           |            |             |
|----|-----------------------------------------------------------------------------------------------------------------------------------------------------------------------------------------------------------------------------------------------------|----------|----------|-----------|------------|-------------|
| 14 | Is there a suitable preventative medicine programme in place?                                                                                                                                                                                       |          |          |           |            |             |
| 15 | Does the facility normally perform necropsies?                                                                                                                                                                                                      |          |          |           |            |             |
| 16 | Are suitable samples from necropsies submitted for pathological analysis?                                                                                                                                                                           |          |          |           |            |             |
| 17 | Is the area where necropsies are performed suitable?                                                                                                                                                                                                |          |          |           |            |             |
| 18 | Are deceased animals stored away from food and disposed of appropriately?                                                                                                                                                                           |          |          |           |            |             |
| 19 | Is there a safe and effective programme for the control of pests and where necessary, predators?                                                                                                                                                    |          |          |           |            |             |
| 20 | Is there well maintained and appropriate animal capture equipment available on site, along with a sufficient number of trained staff to use it?                                                                                                     |          |          |           |            |             |
| 21 | Does the facility maintain up-to-date veterinary records on the health of individual animals within the collection?                                                                                                                                 |          |          |           |            |             |
| 22 | Does a review of clinical records, animal health management and disease issues take place?                                                                                                                                                          |          |          |           |            |             |
| 23 | Are there written protocols for the euthanasia of animals?                                                                                                                                                                                          |          |          |           |            |             |
| 24 | Is euthanasia carried out under veterinary supervision, or by a competent, senior staff member properly trained and experienced in the techniques used, who has access to the necessary equipment and facilities and who is available at all times? |          |          |           |            |             |
| 25 | Are the circumstances mandating euthanasia or humane killing appropriate?                                                                                                                                                                           |          |          |           |            |             |
| 26 | Is there any form of ethical review or oversight?                                                                                                                                                                                                   |          |          |           |            |             |
|    | <b>Animal Management</b>                                                                                                                                                                                                                            | <b>A</b> | <b>Q</b> | <b>UA</b> | <b>Nap</b> | <b>Nass</b> |
| 27 | Do the majority of the enclosures appear to be clean and well maintained?                                                                                                                                                                           |          |          |           |            |             |

|    |                                                                                                                                       |  |  |  |  |  |
|----|---------------------------------------------------------------------------------------------------------------------------------------|--|--|--|--|--|
| 28 | Where appropriate, are the animals maintained in social groups of suitable composition (eg number, age and sex ratio)?                |  |  |  |  |  |
| 29 | Are there any naturally social species currently housed in enclosures on their own?                                                   |  |  |  |  |  |
| 30 | Does management practice ensure that undue dominance by individuals is avoided?                                                       |  |  |  |  |  |
| 31 | Does management practice ensure that persistent and unresolved conflict is avoided?                                                   |  |  |  |  |  |
| 32 | Does management practice ensure that physical carrying capacity is not overburdened?                                                  |  |  |  |  |  |
| 33 | Is the total number of animals accommodated appropriate for the area of land occupied by the institution and the available resources? |  |  |  |  |  |
| 34 | Does management practice ensure that an uncontrolled build-up of parasites and other pathogens is prevented?                          |  |  |  |  |  |
| 35 | Is separate accommodation provided where appropriate for pregnant mothers and animals with young?                                     |  |  |  |  |  |
| 36 | Are animals kept in temporary accommodation? If yes, is their situation regularly and appropriately assessed?                         |  |  |  |  |  |
| 37 | Do the majority of enclosure environments provide for the well-being of the animals throughout the year?                              |  |  |  |  |  |
| 38 | Are the environmental temperature and humidity levels maintained appropriately for the animals?                                       |  |  |  |  |  |
| 39 | Is there adequate ventilation and appropriate lighting in indoor areas and holding areas?                                             |  |  |  |  |  |
| 40 | Are any of the enclosures located where there is loud or excessive noise?                                                             |  |  |  |  |  |
| 41 | Are the majority of the enclosure substrates, design features and furniture sufficient to provide enough shelter and refuge for all   |  |  |  |  |  |

|    |                                                                                                                                                                                                           |          |          |           |            |             |
|----|-----------------------------------------------------------------------------------------------------------------------------------------------------------------------------------------------------------|----------|----------|-----------|------------|-------------|
|    | specimens displayed, including those kept in multi-species exhibits?                                                                                                                                      |          |          |           |            |             |
| 42 | Are the majority of the enclosure substrates, design features and furniture sufficient to provide for the behavioural needs of all individuals displayed, including those kept in multi-species exhibits? |          |          |           |            |             |
| 43 | Is the drainage of the majority of enclosures safe, efficient and appropriate?                                                                                                                            |          |          |           |            |             |
| 44 | In aquatic enclosures are appropriate water quality parameters measured and controlled?                                                                                                                   |          |          |           |            |             |
| 45 | Is the equipment (including back up facilities) that is necessary to ensure correct enclosure environmental provision well maintained?                                                                    |          |          |           |            |             |
| 46 | Can personnel service all enclosures in a manner that is both safe to themselves and the inhabitants?                                                                                                     |          |          |           |            |             |
| 47 | If there are free ranging animals on site (eg peacocks, guinea fowl), are they monitored and is there a documented husbandry and management protocol for their care?                                      |          |          |           |            |             |
|    | <b>Behaviour &amp; Mental Health</b>                                                                                                                                                                      | <b>A</b> | <b>Q</b> | <b>UA</b> | <b>Nap</b> | <b>Nass</b> |
| 48 | Do indoor, outdoor and holding enclosure areas all allow for normal behaviour patterns and ranges of movements to be expressed?                                                                           |          |          |           |            |             |
| 49 | Is environmental enrichment regularly provided?                                                                                                                                                           |          |          |           |            |             |
| 50 | Are the animals generally bright, alert and interested and engaged in their surroundings?                                                                                                                 |          |          |           |            |             |
| 51 | Are positive animal behaviours (eg play, exploration, rest, normal feeding, etc) observed?                                                                                                                |          |          |           |            |             |
| 52 | Are negative animal behaviours (eg over-grooming, avoidance, stereotyping, hyper-aggression, apathy, etc) observed?                                                                                       |          |          |           |            |             |
| 53 | Are any of the animals restrained or tethered at any time?                                                                                                                                                |          |          |           |            |             |

|    | Food and food hygiene                                                                                          | A | Q | UA | Nap | Nass |
|----|----------------------------------------------------------------------------------------------------------------|---|---|----|-----|------|
| 54 | Are the animals generally in good body condition?                                                              |   |   |    |     |      |
| 55 | Are there any animals that are underweight?                                                                    |   |   |    |     |      |
| 56 | Are there any animals that are overweight?                                                                     |   |   |    |     |      |
| 57 | Do all animals have ready access to plenty of clean, potable water?                                            |   |   |    |     |      |
| 58 | Is food sourced from a reputable supplier, ensuring that it is free from any contaminants?                     |   |   |    |     |      |
| 59 | Is the quality of animal foodstuffs adequate and acceptable?                                                   |   |   |    |     |      |
| 60 | Is the quantity of food provided for the animals documented, adequate and the consumption thereof, monitored?. |   |   |    |     |      |
| 61 | Does the provided food meet the specific nutritional requirements of each species and of each individual?      |   |   |    |     |      |
| 62 | Is dietary supplementation given?                                                                              |   |   |    |     |      |
| 63 | Are supplies of food and drink prepared under hygienic conditions?                                             |   |   |    |     |      |
| 64 | Is food stored correctly to protect it from damp, deterioration and contamination by pests?                    |   |   |    |     |      |
| 65 | Are perishable foods kept refrigerated?                                                                        |   |   |    |     |      |
| 66 | Is the manner of feeding safe for both the animals and the staff?                                              |   |   |    |     |      |
| 67 | Are there enough food and drinking sites so as to be accessible to every animal within a particular enclosure? |   |   |    |     |      |
| 68 | Are food and drink provided in such a way that they meet the biological and behavioural needs of the animal?   |   |   |    |     |      |
| 69 | Are feeding enrichment techniques used?                                                                        |   |   |    |     |      |
| 70 | Are the diets of the animals reviewed regularly?                                                               |   |   |    |     |      |

|    |                                                                                                                                              |          |          |           |            |             |
|----|----------------------------------------------------------------------------------------------------------------------------------------------|----------|----------|-----------|------------|-------------|
| 71 | Are there feeding protocols in place should hand rearing be necessary?                                                                       |          |          |           |            |             |
| 72 | Are live vertebrate animals offered as food to any animal?                                                                                   |          |          |           |            |             |
|    | <b>Animal Records</b>                                                                                                                        | <b>A</b> | <b>Q</b> | <b>UA</b> | <b>Nap</b> | <b>Nass</b> |
| 73 | Are up to date records (including husbandry details, daily behavioural observations, etc) held for all individual animals?                   |          |          |           |            |             |
| 74 | Is the system of recording information easy to search, secure and fit for purpose?                                                           |          |          |           |            |             |
| 75 | Does the facility have any form of collection plan?                                                                                          |          |          |           |            |             |
| 76 | Can all of the animals held at the institution be individually identified? If so, what methods of individual animal identification are used? |          |          |           |            |             |
|    | <b>Enclosures &amp; Barriers</b>                                                                                                             | <b>A</b> | <b>Q</b> | <b>UA</b> | <b>Nap</b> | <b>Nass</b> |
| 77 | Are the enclosures and barriers designed, constructed and in such a condition to safely contain animals within the desired enclosures?       |          |          |           |            |             |
| 78 | Are the enclosures free from vegetation or other items that would aid animal escape?                                                         |          |          |           |            |             |
| 79 | Are gates/doors to enclosures containing hazardous animals securely locked at all times?                                                     |          |          |           |            |             |
| 80 | Do gates/doors to enclosures appear to be as strong and effective in containing the animals as the rest of the enclosure barrier?            |          |          |           |            |             |
| 81 | Where appropriate, are adequate standoff barriers provided to prevent direct contact between visitors and enclosures?                        |          |          |           |            |             |
|    | <b>Visitors, Animal Contact &amp; Training</b>                                                                                               | <b>A</b> | <b>Q</b> | <b>UA</b> | <b>Nap</b> | <b>Nass</b> |
| 82 | Are the animals welfare needs appropriately managed with due regard to the requirements of the viewing public?                               |          |          |           |            |             |
| 83 | Does the unregulated feeding of the animals by visitors take place?                                                                          |          |          |           |            |             |

|    |                                                                                                                                                                              |          |          |           |            |             |
|----|------------------------------------------------------------------------------------------------------------------------------------------------------------------------------|----------|----------|-----------|------------|-------------|
| 84 | Is the regulated feeding of specific animals by visitors permitted? If so, under what specific circumstances is it allowed and how is it supervised, controlled and managed? |          |          |           |            |             |
| 85 | Does the facility have animal demonstrations, shows and/or animal rides or undertake any form of animal contact?                                                             |          |          |           |            |             |
| 86 | Are animals ever involved in animal contact situations off-site?                                                                                                             |          |          |           |            |             |
| 87 | Are animals handled only by or under the supervision of authorised personnel?                                                                                                |          |          |           |            |             |
| 88 | Does the handling of animals by personnel appear to be consistent with the animal's welfare?                                                                                 |          |          |           |            |             |
| 89 | If there are any animal-training programmes in place at the institution, are they documented and appropriate in technique, duration and purpose?                             |          |          |           |            |             |
| 90 | Are appropriate barriers used to assist with training?                                                                                                                       |          |          |           |            |             |
| 91 | Is physical punishment of the animals ever used?                                                                                                                             |          |          |           |            |             |
| 92 | Is there regular monitoring and review of animal contact and training programmes?                                                                                            |          |          |           |            |             |
|    | <b>Transactions and Transport</b>                                                                                                                                            | <b>A</b> | <b>Q</b> | <b>UA</b> | <b>Nap</b> | <b>Nass</b> |
| 93 | Are there facilities for crating and transporting animals?                                                                                                                   |          |          |           |            |             |
| 94 | Are routine veterinary examinations performed prior to transport?                                                                                                            |          |          |           |            |             |
| 95 | Is quarantine implemented on arrival of acquisitions?                                                                                                                        |          |          |           |            |             |
| 96 | Is animal population management regularly reviewed?                                                                                                                          |          |          |           |            |             |
| 97 | Are acquisition and disposition activities legal and ethical?                                                                                                                |          |          |           |            |             |

|     |                                                                                                   |          |          |           |            |             |
|-----|---------------------------------------------------------------------------------------------------|----------|----------|-----------|------------|-------------|
| 98  | Are there records kept of the movement of animals into and out of the institution?                |          |          |           |            |             |
|     | <b>Health &amp; Safety</b>                                                                        | <b>A</b> | <b>Q</b> | <b>UA</b> | <b>Nap</b> | <b>Nass</b> |
| 99  | Are there procedures and equipment in place in the event of a dangerous animal escape?            |          |          |           |            |             |
| 100 | Are the emergency protocols practised and if so, how often?                                       |          |          |           |            |             |
| 101 | Are records kept in the event of an animal escape/attack?                                         |          |          |           |            |             |
| 102 | Do staff receive training in animal health, disinfection principles and hygiene practices?        |          |          |           |            |             |
| 103 | Does the facility have clear procedures for working with hazardous animals?                       |          |          |           |            |             |
|     | <b>Other</b>                                                                                      | <b>A</b> | <b>Q</b> | <b>UA</b> | <b>Nap</b> | <b>Nass</b> |
| 104 | Are there adequate provisions for the proper storage and disposal of animal waste?                |          |          |           |            |             |
| 105 | Does the facility have continuing financial support?                                              |          |          |           |            |             |
| 106 | Does the total financial support appear to be adequate to meet the needs of the facility?         |          |          |           |            |             |
|     | <b>Personnel</b>                                                                                  | <b>A</b> | <b>Q</b> | <b>UA</b> | <b>Nap</b> | <b>Nass</b> |
| 107 | Is the staff adequately directed?                                                                 |          |          |           |            |             |
| 108 | Is the staffing level appropriate to provide the required standards of animal husbandry and care? |          |          |           |            |             |
| 109 | Do staff members regularly meet to discuss problems and possible solutions?                       |          |          |           |            |             |
| 110 | In general do there appear to be good working relations in the zoos?                              |          |          |           |            |             |
| 111 | Are animal care staff up to date with developments in their field of expertise?                   |          |          |           |            |             |
| 112 | Is there provision for staff training and further development?                                    |          |          |           |            |             |
